# Supplementary material for: Quantitative Determination of Ethylene Using a Smartphone-Based Optical Fiber Sensor (SOFS) Coupled with Pyrene-Tagged Grubbs Catalyst
Source: MDPI journal article supplement (doi:10.3390/bios12050316), 2022-05-10
Supplement: s1 [file s1]

## Supporting Information

# Quantitative Determination of Ethylene Using a Smartphone-Based Optical Fiber Sensor (SOFS) Coupled with Pyrene-Tagged Grubbs Catalyst

Xin Yang <sup>1,†</sup>, Justin Lee Kee Leong <sup>1,†</sup>, Mingtai Sun <sup>1,2,\*</sup>, Linzhi Jing <sup>1,3</sup>, Yuannian Zhang <sup>1</sup>, Tian Wang <sup>4</sup>, Suhua Wang <sup>2</sup> and Dejian Huang <sup>1,3,\*</sup>

<sup>1</sup> Department of Food Science and Technology, National University of Singapore, 2 Science Drive 2, Singapore 117542, Singapore; xinyang@u.nus.edu (X.Y.); justinleekl@gmail.com (J.L.K.L.); e0047517@u.nus.edu (L.J.); zhangyuannian@u.nus.edu (Y.Z.)

<sup>2</sup> School of Environmental Science and Engineering, Guangdong University of Petrochemical Technology, Maoming 525000, China; wangsuahua@ncepu.edu.cn

<sup>3</sup> National University of Singapore (Suzhou) Research Institute, 377 Linquan Street, Suzhou 215123, China

<sup>4</sup> Department of Chemistry, National University of Singapore, 3 Science Drive 3, Singapore 117543, Singapore; tian.wang91@u.nus.edu

\* Correspondence: mtsun@gdpuet.edu.cn (M.S.); dejian@nus.edu.sg (D.H.)

† These two authors contributed equally to this work.

\* To whom correspondence should be addressed:  
mtsun@gdpuet.edu.cn (M. Sun); dejian@nus.edu.sg (D. Huang)

## Table of contents

|                                             |   |
|---------------------------------------------|---|
| I. ADDITIONAL EXPERIMENTAL PROCEDURES ..... | 2 |
| II. TABLE & FIGURE.....                     | 3 |

### I. ADDITIONAL EXPERIMENTAL PROCEDURES

#### **Procedures for preparing interfering gases.**

Sodium sulfite ( $\text{Na}_2\text{SO}_3$ ) was freshly prepared with a stock solution concentration of 10.0 mM in PB 7.4 solution.  $\text{SO}_2$  gas was prepared from the reaction of  $\text{Na}_2\text{SO}_3$  with concentrated  $\text{H}_2\text{SO}_4$  in a 25 mL round bottom flask. Carbon dioxide ( $\text{CO}_2$ ) was prepared by diluting the pure  $\text{CO}_2$  gas to the target concentration in a 25 mL round bottom flask.  $\text{NO}_2$  gas was prepared from the reaction of pure NO with air in a 25 mL round bottom flask.  $\text{H}_2\text{S}$  gas was prepared from the addition of  $\text{Na}_2\text{S}$  with PB 7.4 solution in a 25 mL round bottom flask.  $\text{NH}_3$  gas was prepared from the reaction of  $\text{NH}_4\text{Cl}$  with  $\text{Ca}(\text{OH})_2$  in a 25 mL round bottom flask. Generally, 2 mL of these gas samples were slowly bubbled 1 mL dichloromethane before addition of 30  $\mu\text{L}$  PYG probe stock solution and shaken for 3 min. The RGB values were recorded using a CMOS sensor with ISO 800, exposure rate 1/30s and 1440p.

## II. TABLE and FIGURE

**Table S1.** RGB values of the PYG solution bubbled with different concentrations of ethylene.

| Concentration of Ethylene (ppm) | $R_{\mu}$ | $G_{\mu}$ | $B_{\mu}$ |
|---------------------------------|-----------|-----------|-----------|
| 500                             | 1.33      | 36.00     | 107.67    |
| 400                             | 1.00      | 49.67     | 116.33    |
| 350                             | 1.33      | 72.00     | 143.00    |
| 300                             | 1.67      | 73.67     | 139.33    |
| 250                             | 1.33      | 79.00     | 134.67    |
| 200                             | 1.33      | 84.00     | 138.00    |
| 150                             | 1.33      | 82.00     | 120.33    |
| 100                             | 1.67      | 82.67     | 115.00    |
| 75                              | 1.67      | 85.33     | 114.33    |
| 50                              | 1.67      | 86.67     | 111.33    |
| 37.5                            | 1.33      | 90.00     | 111.67    |
| 25                              | 1.00      | 98.00     | 117.33    |
| 20                              | 1.33      | 85.00     | 100.67    |
| 15                              | 2.00      | 74.00     | 87.67     |
| 0                               | 1.00      | 65.00     | 74.00     |

**Table S2.**  $(B/G)/(B/G)_0$  values of the PYG solution bubbled with different interfering gases and ethylene at 100 ppm.

| Species          | $(B/G)/(B/G)_0$ |
|------------------|-----------------|
| Blank            | 1.233           |
| Ethylene         | 1.029           |
| MeOH             | 1.022           |
| EtOH             | 1.000           |
| 1-prop           | 0.992           |
| H <sub>2</sub> O | 1.009           |
| EA               | 1.009           |
| Tol              | 1.001           |
| THF              | 1.222           |

**Table S3.** (B/G)/(B/G)<sub>0</sub> values of the PYG solution bubbled with different interfering gases and ethylene at 100 ppm.

| Gas Species      | w/o Ethylene | w Ethylene |
|------------------|--------------|------------|
| Blank            | 1            | 1.225      |
| SO <sub>2</sub>  | 1.029        | 1.235      |
| CO <sub>2</sub>  | 1.020        | 1.227      |
| NH <sub>3</sub>  | 0.989        | 1.184      |
| NO <sub>2</sub>  | 1.008        | 1.224      |
| H <sub>2</sub> S | 1.012        | 1.222      |

**Table S4.** Ethylene concentration of avocados in an airtight jar incubated over 8 hours.

| Time | B/G <sub>1</sub> | B/G <sub>2</sub> | B/G <sub>3</sub> | Mean  | STDEV | (B/G)/(B/G) <sub>0</sub> | [Ethylene] (ppm) |
|------|------------------|------------------|------------------|-------|-------|--------------------------|------------------|
| 0    | 1.132            | 1.145            | 1.135            | 1.137 | 0.009 | 1.000                    | 0                |
| 2    | 1.179            | 1.187            | 1.184            | 1.183 | 0.004 | 1.041                    | 19.112           |
| 4    | 1.246            | 1.235            | 1.232            | 1.238 | 0.008 | 1.089                    | 41.564           |
| 6    | 1.280            | 1.284            | 1.296            | 1.287 | 0.008 | 1.132                    | 61.730           |
| 8    | 1.318            | 1.326            | 1.330            | 1.325 | 0.006 | 1.165                    | 77.337           |

**Table S5.** Ethylene concentration of apples in an airtight jar incubated over 8 hours.

| Time | B/G <sub>1</sub> | B/G <sub>2</sub> | B/G <sub>3</sub> | Mean  | STDEV | (B/G)/(B/G) <sub>0</sub> | [Ethylene] (ppm) |
|------|------------------|------------------|------------------|-------|-------|--------------------------|------------------|
| 0    | 1.321            | 1.327            | 1.327            | 1.325 | 0.005 | 1.000                    | 0                |
| 2    | 1.379            | 1.350            | 1.357            | 1.362 | 0.015 | 1.027                    | 12.464           |
| 4    | 1.383            | 1.407            | 1.393            | 1.395 | 0.012 | 1.050                    | 23.529           |
| 6    | 1.422            | 1.415            | 1.418            | 1.418 | 0.003 | 1.069                    | 32.353           |
| 8    | 1.435            | 1.433            | 1.448            | 1.439 | 0.008 | 1.084                    | 39.654           |

**Table S6.** Ethylene concentration of bananas in an airtight jar incubated over 8 hours.

| Time | B/G <sub>1</sub> | B/G <sub>2</sub> | B/G <sub>3</sub> | Mean  | STDEV | (B/G)/(B/G) <sub>0</sub> | [Ethylene] (ppm) |
|------|------------------|------------------|------------------|-------|-------|--------------------------|------------------|
| 0    | 1.241            | 1.236            | 1.232            | 1.236 | 0.004 | 1.000                    | 0                |
| 2    | 1.284            | 1.297            | 1.299            | 1.293 | 0.008 | 1.046                    | 21.475           |
| 4    | 1.333            | 1.328            | 1.333            | 1.332 | 0.003 | 1.077                    | 36.161           |
| 6    | 1.381            | 1.379            | 1.375            | 1.378 | 0.003 | 1.115                    | 53.840           |
| 8    | 1.435            | 1.443            | 1.429            | 1.436 | 0.007 | 1.161                    | 75.596           |
